1 **Bixafen, a succinate dehydrogenase inhibitor fungicide, causes microcephaly and**  
2 **motor neuron axon defects during development**

3

4 Rahma Hassan-Abdi, Alexandre Brenet, and Nadia Soussi-Yanicostas\*

5

6

7 Université de Paris, NeuroDiderot, Inserm, F-75019 Paris, France

8 **(\*)Correspondence:** [nadia.soussi@inserm.fr](mailto:nadia.soussi@inserm.fr); Tel.: +00-33140-03-1931 (France)

9

10

11

12

13

14 **Running title:** Neurodevelopmental defects in bixafen-exposed embryos

15

16

17

18

19

20 **Keywords:** Succinate dehydrogenase inhibitors, SDHI, Fungicide, Zebrafish,

21 Neurodevelopment, *In vivo* imaging

22

23

24 **Abstract**

25

26 Succinate dehydrogenase inhibitors (SDHIs) are the most widely used fungicides against  
27 plant parasitic fungi. They act by blocking the enzyme succinate dehydrogenase (SDH), a  
28 key component of mitochondrial respiration, which is highly conserved throughout  
29 evolution. Recently, it has been reported that some SDHIs used in many fungicides do not  
30 only inhibit the SDH activity of target fungi but can also block several non-target human  
31 cells in *in vitro* models. This study reveals a lack of SDHI species specificity and so points  
32 to a major health risk for exposed organisms, including humans. Despite the frequent  
33 detection of SDHIs in the environment and on harvested products and their increasing  
34 use in modern agriculture, their potential toxic effects *in vivo*, especially on  
35 neurodevelopment, are still under-evaluated. Here, we assessed the neurotoxicity of  
36 bixafen, one of the latest-generation SDHIs, which had never been tested during  
37 neurodevelopment. For this purpose, we used a well-known vertebrate model for toxicity  
38 testing, namely zebrafish transparent embryos, and live imaging using transgenic lines  
39 labelling the brain and spinal cord. Here we show that bixafen causes microcephaly and  
40 defects on motor neuron axon outgrowth and their branching during development. Our  
41 findings show that the central nervous system is highly sensitive to bixafen, thus  
42 demonstrating for the first time *in vivo* that an SDHI, bixafen, widely used in agriculture,  
43 is neurotoxic in vertebrates and causes neurodevelopmental defects. This work adds to  
44 our knowledge of the toxic effect of SDHIs on neurodevelopment and may help us take the  
45 appropriate precautions to ensure protection against the neurotoxic effects of these  
46 substances

47

48

## 49 **Introduction**

50 Bixafen, a methyl-pyrazole carboxamide, is a fungicide widely used on cereal and  
51 rapeseed crops. It was initially approved and launched in the market in 2011 by Bayer  
52 (Ravichandra, 2018). Its high efficiency and fast penetration resulted in a significant rise  
53 in usage in Europe and the US. Currently, nearly thirty different products are authorized  
54 and present on the French market alone that contain bixafen as sole active substance or  
55 mixed with other fungicides. Bixafen belongs to the succinate dehydrogenase inhibitor  
56 (SDHI) family, the most widely used fungicides in agriculture as a treatment against a  
57 broad range of fungal diseases. It is categorized as one of the latest-generation SDHIs  
58 derived from carboxin. Bixafen, like all the latest generation SDHIs, acts in a similar way  
59 to carboxin, through inhibition of mitochondrial respiration chain complex II, also known  
60 as succinate dehydrogenase (SDH). The complex II targeted by SDHI is not specific to the  
61 targeted disease fungi but is also closely similar to that present in all plant and animals  
62 species, including humans. SDHI inhibitory action on mitochondrial activity has thus been  
63 shown to be effective in various models and human cells (Bénil et al., 2019). Additionally,  
64 these latest generation SDHIs have been shown to also inhibit mitochondrial respiration  
65 complex III (Bénil et al., 2019), suggesting more critical effects of these new fungicides  
66 than those expected. SDH activity has been shown to be irreplaceable in mitochondrial  
67 metabolism, and defects in its activity impair the cellular metabolome and functions  
68 (Bénil et al., 2014). A broad range of human diseases from neurodegeneration to cancer  
69 are related to SDH complex defects. Several studies have shown that SDH complex  
70 mutations are associated with several diseases, such as Leigh syndrome, an early-onset  
71 progressive neurodegenerative disease characterized by developmental delay, ataxia,  
72 seizures, and defects in the brain and spinal cord (Birch-Machin et al., 2000; Bourgeron,  
73 2015; Finsterer, 2008; Horváth et al., 2006; Parfait et al., 2000; Van Coster et al., 2003).

74 SDH mutations have also been associated with several tumors, familial paraganglioma  
75 syndrome, infantile leukoencephalopathy, thyroid and renal cancers, and neuroblastoma  
76 (Ghezzi et al., 2009; Martin et al., 2007; Perry et al., 2006; Ricketts et al., 2009; Stratakis  
77 and Carney, 2009; Timmers et al., 2009). One study showed that the SDHI fungicide  
78 isopyrazam increased uterine tumor formation in rats (Yoshida et al., 2015). The  
79 Norwegian scientific committee for food safety (VKM) has assessed the health and  
80 environmental risk of Aviator Xpro EC225, a fungicide containing bixafen, and concluded  
81 that the effects of bixafen in animals should be considered relevant for humans (VKM  
82 Report, 2014). Also, M44, a bixafen metabolite, which has the potential to contaminate  
83 groundwater, causes abnormalities in the rabbit fetus, suggesting that similar effects in  
84 humans cannot be excluded (VKM Report, 2015).

85 Despite the frequent detection of SDHIs in the environment and on harvested products  
86 (Abad-Fuentes et al., 2015; Añasco et al., 2010; Tanabe and Kawata, 2009; Tsuda et al.,  
87 2009; Vu et al., 2016) and their increasing use in modern agriculture, their potential toxic  
88 effects, especially on neurodevelopment, are still under-evaluated. Hence the need to  
89 assess the neurotoxicity of these SDHI fungicides *in vivo* on neurodevelopment. In this  
90 study, we tested the potential toxic effect of one of the latest-generation SDHIs, bixafen, in  
91 zebrafish embryos. We observed that embryos exposed to bixafen developed a series of  
92 defects during growth, including microcephaly and major defects in spinal cord motor  
93 neuron axons and their branching, showing the toxicity of this SDHI on central nervous  
94 system neurodevelopment. Our study gives insight into the environmental risk of bixafen  
95 on neurodevelopment.

96

## 97 **Results**

### 98 **1. Toxicity of bixafen toward zebrafish embryos**

99 To assess the potential toxicity of bixafen, a succinate dehydrogenase inhibitor  
100 belonging to the pyrazole group of fungicides, 6 hours post-fertilization (hpf) zebrafish  
101 embryos were treated with increasing doses of bixafen from 0.1  $\mu\text{M}$  to 1  $\mu\text{M}$ . As there were  
102 no differences in survival percentage or embryo morphology between the 0.1% DMSO  
103 group and the fish water control group (data not shown), we used 0.1% DMSO for the  
104 control group. Exposure of zebrafish embryos to bixafen resulted in significant  
105 developmental abnormalities and mortality compared with the DMSO control. Mortality  
106 showed a concentration-response effect, with an increasing mortality rate with bixafen  
107 exposure concentration. The median lethal concentration (LC50) of bixafen for zebrafish  
108 embryos, causing a 50% mortality rate at 4 days post-fertilization (dpf), was calculated at  
109 0.5  $\mu\text{M}$ . The surviving embryos treated with 0.5  $\mu\text{M}$  of bixafen displayed a curved tail  
110 (Figure 1E, red arrowhead) causing body shortening (Figure 1F,  $33.8 \pm 1.5$  mm); and  
111 edemas around the heart, eye and head (Figure 1E, yellow arrowheads) causing a swollen  
112 head (Figure 1G,  $38.1 \pm 0.8$  mm), compared to the DMSO control embryos (Figure 1C)  
113 body (Figure 1F,  $37.2 \pm 0.6$  mm) and head (Figure 1G,  $5.8 \pm 0.2$  mm).

114 We then determined the lowest-observed-adverse-effect-level (LOAEL) concentration  
115 of bixafen (0.3  $\mu\text{M}$ ), i.e. the lowest exposure level at which we observed the first noticeable  
116 body deformity observed in most bixafen exposed embryos, which was a slight edema  
117 around the heart. Embryos treated at the LOAEL (0.3  $\mu\text{M}$ ) displayed only a modest-size  
118 pericardial edema (Figure 1D, yellow arrowhead) but no significant difference in body  
119 size (Figure 1F,  $35.7 \pm 0.7$  mm vs.  $37.2 \pm 0.6$  mm) or head size (Figure 1G,  $5.5 \pm 0.4$  mm vs.  
120  $5.8 \pm 0.2$  mm) after body and head measurements (Figure 1B). In this study, we used two

121 transgenic lines Tg(huC:G/U:RFP) and Tg(Olig2:eGFP) to analyze the embryos exposed to  
122 LOAEL and LC50 concentrations and compare the resulting defects.

123

## 124 **2. Brain defects in embryos exposed to bixafen**

125 Several studies have reported that a number of SDHIs cause neurotoxicity (Wang et al.,  
126 2020; Yao et al., 2018). We investigated the effect of bixafen exposure on the development  
127 of the central nervous system. To assess the effect of bixafen on brain development  
128 reliably under a fluorescence microscope, we used *elavl3:Gal4/5xUAS:RFP* double  
129 transgenic embryos (hereafter called Tg(huC:G/U:RFP)), in which red fluorescence  
130 protein (RFP) is expressed in postmitotic neurons, thus clearly delineating central  
131 nervous system boundaries. We treated 6 hpf embryos from Tg(huC:G/U:RFP) transgenic  
132 line with the determined LOAEL (0.3  $\mu\text{M}$ ) and LC50 (0.5  $\mu\text{M}$ ) concentrations, and imaged  
133 live brain morphology at 30 hpf and 60 hpf (Figure 1A, N). Live imaging of embryo brains  
134 treated at 30 hpf and 60 hpf showed a smaller brain structure (Figure 1H-M). These  
135 observations were confirmed by quantifications of brain volume after three-dimensional  
136 reconstruction of embryo brains based on RFP positive neurons (Imaris software,  
137 Bitplane) at 30 hpf (Figure 1O; DMSO:  $3.50 \pm 0.18 \times 10^6 \mu\text{m}^3$ , Bixafen 0.3 $\mu\text{M}$ :  $2.06 \pm 0.17$   
138  $\times 10^6 \mu\text{m}^3$ , Bixafen 0.5 $\mu\text{M}$ :  $1.43 \pm 0.23 \times 10^6 \mu\text{m}^3$ ) and 60 hpf (Figure 1P; DMSO:  $15.37 \pm$   
139  $0.44 \times 10^6 \mu\text{m}^3$ , Bixafen 0.3 $\mu\text{M}$ :  $10.35 \pm 0.52 \times 10^6 \mu\text{m}^3$ , Bixafen 0.5 $\mu\text{M}$ :  $5.66 \pm 0.73 \times 10^6$   
140  $\mu\text{m}^3$ ). We also observed an absence of photoreceptors in the retina of embryos exposed  
141 to the LC50 (Figure 1J, M, asterisks). Brain volume measurements were significantly  
142 reduced in embryos treated with bixafen at LOAEL (Figure 1 I, L). This defect was

143 worsened at LC50 (Figure 1 J, M) compared to controls (Figure 1 H, K), showing that the  
144 toxicity of bixafen led to microcephaly.

145

### 146 **3. Defective spinal motor neuron axon outgrowth in embryos exposed to** 147 **bixafen**

148 We found that more than 80% of embryos treated with LC50 displayed behavior defects  
149 in a touch-response test (data not shown) compared to DMSO controls. We therefore  
150 investigated whether these motor defects were due to abnormal development of motor  
151 neurons or impaired pathfinding of their axons. To determine whether the spinal motor  
152 neuron axons were affected in bixafen-treated embryos, we used transgenic line  
153 Tg(Olig2:eGFP), in which eGFP is expressed in motor neuron progenitor cells, labeling  
154 motor axons. Live embryos treated or not with bixafen were imaged by confocal  
155 microscopy at 30 hpf and 60 hpf. We specifically analyzed caudal primary motor neuron  
156 (CaPMN) axons, which are the most accessible (Figure 2A, H). At 30 hpf, in control  
157 embryos and LOAEL treated embryos, 100% of spinal motor neuron axons extended  
158 ventrally to contact their muscle targets (Figures 2B, C). By contrast, in LC50 treated  
159 embryos, at 30 hpf, the spinal neuron axons exited the spinal cord and showed a severe  
160 delay in outgrowth (Figure 2D). Length measurements of three-dimensionally  
161 reconstructed CaPMN axons confirmed that these axons were significantly shorter in  
162 embryos treated with bixafen at LOAEL and that this effect was worsened in embryos  
163 exposed to bixafen LC50 concentrations (Figure 2I). At 60 hpf, in control embryos, the  
164 CaPMN axons followed a stereotyped pathway, extending ventrally in the space between  
165 the notochord and the myotome (Figure 2E, E'). At the ventral edge of the musculature,  
166 each axon turned dorsally and laterally to grow along the dorsal myoseptum. However, in  
167 bixafen-treated embryos at 60 hpf, axons showed a defective phenotype as determined by

168 their branching pattern at the choice point and/or the horizontal myoseptum (Figures 2  
169 F, G, F', G'). At LC50, CaPMN axons extended aberrant branches projecting in all directions  
170 instead of extending ventrally within the myotome (Figure 2G'). Hence treatment with  
171 bixafen disorganized motor axon growth at LOAEL concentration and this effect was  
172 worsened at the LC50 concentration. Length measurements of three-dimensionally  
173 reconstructed CaPMN axons confirmed this observation, with significantly shorter axons  
174 in embryos treated with bixafen at 30 hpf (Figure 1I; DMSO:  $172.2 \pm 3.03 \mu\text{m}$ , Bixafen  
175  $0.3\mu\text{M}$ :  $97.1 \pm 3.56 \mu\text{m}$ , Bixafen  $0.5\mu\text{M}$ :  $46.2 \pm 2.3 \mu\text{m}$ ) and 60 hpf (Figure 1J; DMSO:  $406.3$   
176  $\pm 7.65 \mu\text{m}$ , Bixafen  $0.3\mu\text{M}$ :  $272.9 \pm 9.07 \mu\text{m}$ , Bixafen  $0.5\mu\text{M}$ :  $171.3 \pm 11.52 \mu\text{m}$ ). These data  
177 show that exposure to bixafen has a drastic effect on the outgrowth of the spinal motor  
178 axons.



## 179 **Discussion**

180 The developing central nervous system is especially vulnerable and sensitive to  
181 exposure to toxic chemicals in the environment. Succinate dehydrogenase inhibitors  
182 (SDHIs) are widely used as fungicides to control a broad range of fungal diseases, but it  
183 was not known whether these SDHIs had a toxic effect on the developing central nervous  
184 system. In this study we report evidence that exposure to an SDHI, bixafen, induces a  
185 series of neurodevelopmental defects.

186 In this study we used the zebrafish, a valuable vertebrate system for environmental  
187 health research. It enables real-time *in vivo* studies that address potential health hazards  
188 to human embryos, and in particular studies investigating neurodevelopment in a  
189 vertebrate model (Lein et al., 2005). Regarding brain development, we found that bixafen  
190 exposure at the median lethal concentration (LC50) caused major malformation  
191 phenotypes, including eye and brain defects leading to microcephaly. We also observed a  
192 pericardial edema, indicating that bixafen exerts cardiac toxicity. We also found that  
193 embryos treated with the lowest-observed-adverse-effect-level (LOAEL) concentration of  
194 bixafen showed a very discreet morphological phenotype sufficient to induce significant  
195 defects in brain size, indicating that the sublethal dose of bixafen could influence normal  
196 development. Microcephaly has been found in embryos exposed to many fungicides,  
197 including Maxim® XL (Svartz et al., 2016), and glyphosate (Paganelli et al., 2010).  
198 Moreover, bixafen-exposed embryos displayed absence of photoreceptors in the retina.  
199 All these findings suggest that the brain is very vulnerable to many toxic substances even  
200 at low concentrations. A number of studies have shown that prenatal and early childhood  
201 exposure to some pesticides is associated with neurodevelopmental and cognitive  
202 disorders (Muñoz-Quezada et al., 2013). Perinatal exposure of rats to organophosphorus  
203 pesticides alters brain morphometry (Veronesi and Pope, 1990). Similarly, our recent

204 studies have shown that embryos exposed to organophosphorus pesticides showed  
205 neurodevelopmental disorders, including altered excitatory/inhibitory synapse balance  
206 (Brenet et al., 2019).

207       Regarding the spinal cord, our data show that embryos exposed to bixafen show  
208 deficits in touch-induced swimming behavior and display a typical low-activity swimming  
209 behavior. As it is known that the motor neuron is a major cell type regulating swimming  
210 behavior in zebrafish during early life (Brustein et al., 2003), we investigated the  
211 development of the axons of the motor neurons in embryos exposed to bixafen. In the  
212 zebrafish embryos, there are two different kinds of spinal motor neurons, called primary  
213 and secondary motor neurons (Myers, 1985; Myers et al., 1986). The caudal primary  
214 motor neurons (CaPMN) have a soma located in the middle of each spinal cord and axons  
215 extending along a ventral pathway to innervate ventral axial muscle (Westerfield et al.,  
216 1986). In this study, we focused on the CaPMN axons because of their easy observation  
217 and distinct axon projections. In control embryos exposed to 0.1% DMSO, motor neurons  
218 extend their axonal trajectory in a highly stereotyped manner during development.  
219 CaPMN axons exit the spinal cord and extend toward the ventral muscle. However, in  
220 embryos exposed to bixafen, we observed a reduction in axon outgrowth and later defects  
221 in branching of motor axons. Similarly, we found that the low concentration of bixafen  
222 (LOAEL) was sufficient to induce defects in axon outgrowth and branching of motor  
223 neurons during development, indicating that the development of motor neuron axons is  
224 highly sensitive to bixafen. This study reveals motor neuron axon defects in embryos  
225 exposed to bixafen. It also provides data on the toxicity of bixafen fungicides to a  
226 nontarget organism, zebrafish embryos. It has been shown that chlorpyrifos-oxon  
227 pesticide disrupts motor neuron axons (Howard et al., 2005).

228 Bixafen is a methyl-pyrazole, one of the SDHI fungicides used to manage plant diseases  
229 and inhibit the respiration of pathogenic fungi by blocking succinate complex II in the  
230 mitochondrial respiratory chain. SDH is an enzyme involved in both oxidative  
231 phosphorylation and the tricarboxylic acid cycle, two processes that generate energy. This  
232 enzyme has been shown to be irreplaceable in mitochondrial and cell metabolism and also  
233 to be highly conserved among all fungi, plants and animal species (Rehfus et al., 2016;  
234 Veloukas et al., 2013; Yamashita and Fraaije, 2018). Therefore, any adverse change or  
235 inhibition of SDH activity can lead to many diseases, including those that have been linked  
236 to mitochondrial dysfunction (Birch-Machin et al., 2000; Bourgeron, 2015; Finsterer,  
237 2008; Horváth et al., 2006; Parfait et al., 2000; Van Coster et al., 2003).

238 A recent study has questioned the specificity of these SDHs, including bixafen. It showed  
239 that the latest-generation SDHs sold on the market could inhibit the SDH of several  
240 species ranging from earthworms to human cells, evidence that these SDHs are  
241 nonspecific (Bénil et al., 2019). Several epidemiological studies published during the last  
242 two decades suggest harmful effects of pesticides on human health (Merhi et al., 2007;  
243 Weichenthal et al., 2010). Pesticide poisoning is a serious health problem that  
244 disproportionately affects infants and children (Rauh et al., 2012). Pesticides are known  
245 to cause millions of acute poisoning cases per year (Bertolote et al., 2006). Human  
246 exposure to pesticides can occur environmentally, through consumption in food and  
247 water (van den Berg et al., 2012). A number of studies show that prenatal and early  
248 childhood exposure to some pesticides is associated with neurodevelopmental and  
249 cognitive disorders (Muñoz-Quezada et al., 2013; Ross et al., 2013). Very little is known  
250 about the consequences of exposure to SDHs on human health. Currently, we know only  
251 the consequences of the changes in their target, the SDH complex. Mutations in the SDH  
252 complex are associated with several human diseases, including neurodegenerative

253 diseases and cancer (Ardissonne et al., 2015; Birch-Machin et al., 2000; Bourgeron, 2015;  
254 Finsterer, 2008; Horváth et al., 2006; Parfait et al., 2000; Van Coster et al., 2003; Martin et  
255 al., 2007; Perry et al., 2006; Ricketts et al., 2009; Stratakis and Carney, 2009; Timmers et  
256 al., 2009).

257 The fungicide bixafen exists as a pure compound or as an ingredient in 27 approved and  
258 marketed fungicides. Our results will be used as basic data to study the complex mixtures  
259 that contain bixafen. It is not known how bixafen can affect the development of the central  
260 nervous system .Like for all SDHIs, the toxic effect of bixafen observed in this study may  
261 be linked to the basic disruption of mitochondrial activity and accumulation of reactive  
262 oxygen species caused on Complex II inhibition and subsequent oxidative DNA damage.  
263 These severe brain and spinal cord malformations may also be related to the different  
264 metabolic abnormalities reported in SDHI exposed animals (Graillet et al., 2012; Qian et  
265 al., 2018; Wu et al., 2018; Yang et al., 2018). A recent work (Bénil et al., 2019) has shown  
266 that bixafen also exerts an effect on mitochondrial respiration complex III, suggesting an  
267 adverse effect of bixafen on cellular metabolism.

268

269 In summary, our study provides new evidence of bixafen toxicity on neurodevelopment  
270 in a vertebrate model, and and may help us take the appropriate precautions to ensure  
271 protection against the neurotoxic effects of these substances.

272

273

## 274 **Materials and Methods**

### 275 **1. Ethics statement**

276 All the animal experiments described in the present study were conducted at the French  
277 National Institute of Health and Medical Research (INSERM) UMR 1141 in Paris in  
278 accordance with European Union guidelines for the handling of laboratory animals  
279 ([http://ec.europa.eu/environment/chemicals/lab\\_animals/home\\_en.htm](http://ec.europa.eu/environment/chemicals/lab_animals/home_en.htm)). They were  
280 approved by the Direction Départementale de la Protection des Populations de Paris and  
281 the French Animal Ethics Committee under reference No. 2012-15/676-0069.

282

### 283 **2. Zebrafish lines and maintenance**

284 Zebrafish were maintained at 26.5 °C in 14 h light and 10 h dark cycles. Embryos were  
285 collected by natural spawning, and to avoid pigmentation, 0.003% 1-phenyl-2-thiourea  
286 (PTU) was added at 1 dpf (day post-fertilization). The following transgenic lines were  
287 used: Tg(elavl3:Gal4)<sup>zf349</sup> (Akerboom et al., 2012), Tg(5xUAS:RFP)<sup>nkuasrfp1a</sup> (Asakawa et  
288 al., 2008), Tg(Olig2:eGFP) (Shin et al., 2003).

### 289 **3. Chemicals**

290 Dimethyl sulfoxide (DMSO) hybrid-max sterile (Sigma, D2650) was diluted in fish water  
291 to a final concentration of 0.1% (v/v). Bixafen, (*N*-(3',4'-dichloro-5-fluorobiphenyl-2-yl)-  
292 3-(difluoromethyl)-1-methylpyrazole-4-carboxamide) (Sigma, 32581) was dissolved at a  
293 stock concentration of 100 µM in pure DMSO (100%) and conserved at -20 °C in aliquots  
294 until use. 100 µM stocks were diluted in a 0.1% DMSO solution in fish water to final  
295 concentrations of 0.1 µM, 0.2 µM, 0.3 µM, 0.4 µM, 0.5 µM, 0.6 µM, 0.7 µM, 0.8 µM, 0.9 µM  
296 and 1.0 µM to determine lethality and deduce chemical toxicity values.

297 **4. Toxicity assay**

298 Transgenic lines, Tg(huC:G/U:RFP) or Tg (Olig2:eGFP) embryos were collected after  
299 spawning and washed twice with clean fish water. Fertilized and normal 6 hpf embryos  
300 were selected, distributed randomly in 24-well microplates, 20 embryos per well,  
301 following OECD zebrafish embryo toxicological assay directives. Each well was filled with  
302 2 mL of solution for each condition, with 12 conditions in all: fish water, DMSO 0.1%,  
303 Bixafen diluted in DMSO 0.1% at final concentrations of 0.1  $\mu$ M, 0.2  $\mu$ M, 0.3  $\mu$ M, 0.4  $\mu$ M,  
304 0.5  $\mu$ M, 0.6  $\mu$ M, 0.7  $\mu$ M, 0.8  $\mu$ M, 0.9  $\mu$ M and 1.0  $\mu$ M. Each day, dead embryos were selected  
305 under OECD guidelines (coagulation, no heartbeat or no somite) and discarded.

306 **5. Embryo imaging**

307 30 hpf or 60 hpf embryos were anesthetized with 112  $\mu$ g/mL 3-aminobenzoic acid ethyl  
308 ester (tricaine, Sigma), immobilized in 1% low melting-point agarose in the center of a  
309 35 mm glass-bottomed dish (Corning), and covered with fish water containing 112  $\mu$ g/mL  
310 tricaine. For embryo morphology analysis, bright field images were captured using a  
311 stereomicroscope (Zeiss). Live imaging of transgenic lines Tg(huC:G/U:RFP) and  
312 Tg(Olig2:eGFP) was done using a Leica SP8 confocal scanning laser microscope equipped  
313 with a Leica 20x/0.75 multi-immersion objective.

314 **6. Image analysis**

315 Body and head measurements from bright field embryo images were made using the ruler  
316 tool in ImageJ. Brain volume and spinal neuron CaPMN axon length three-dimensional  
317 reconstructions and quantifications were analyzed using Imaris Measurement Pro  
318 (Bitplane Inc.).

319 **7. Statistics**

320 All statistics were obtained on Prism5 (GraphPad) and assessed using a Kruskal-Wallis  
321 test followed by a Dunn post-test. All data are represented as means  $\pm$  SEM.

322

323 **Author Contributions:**

324 R.H.A. performed the experiments and the analysis, designed the figures, and wrote the  
325 original draft. A.B. performed data analysis. N.S.Y. supervised the project and wrote the  
326 manuscript.

327

328 **Funding:** This work was supported by Institut National de la Santé et la Recherche  
329 Médicale (INSERM), the National Center for Scientific Research (CNRS), and the French  
330 National Research Agency (ANR-16-CE18-0010). Funding sources had no involvement in  
331 study design, collection, analysis or interpretation of data, or decision to publish.

332 .

333

334 **Acknowledgments:** We thank Christiane Romain (Inserm UMR 1141), Olivier Bar  
335 (Inserm UMR 1141) for their technical assistance.

336

337 **Conflicts of Interest:** The authors declare that the research was conducted in the absence  
338 of any commercial or financial relationships that could be construed as a potential conflict  
339 of interest.

340

341

342

343

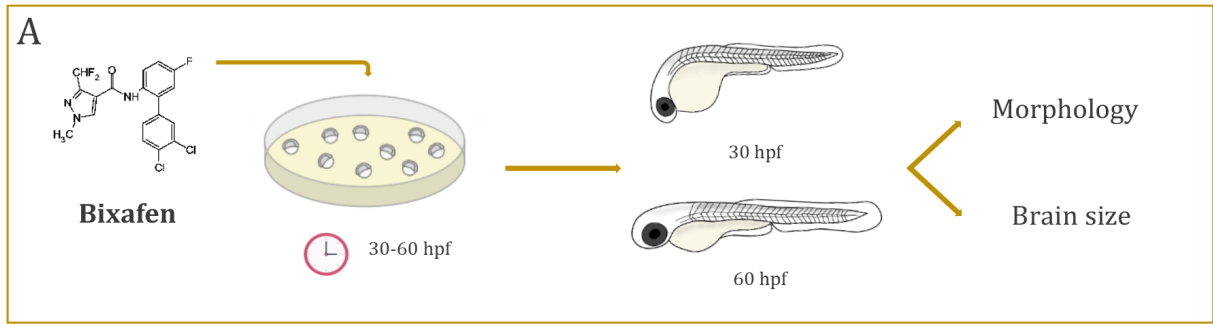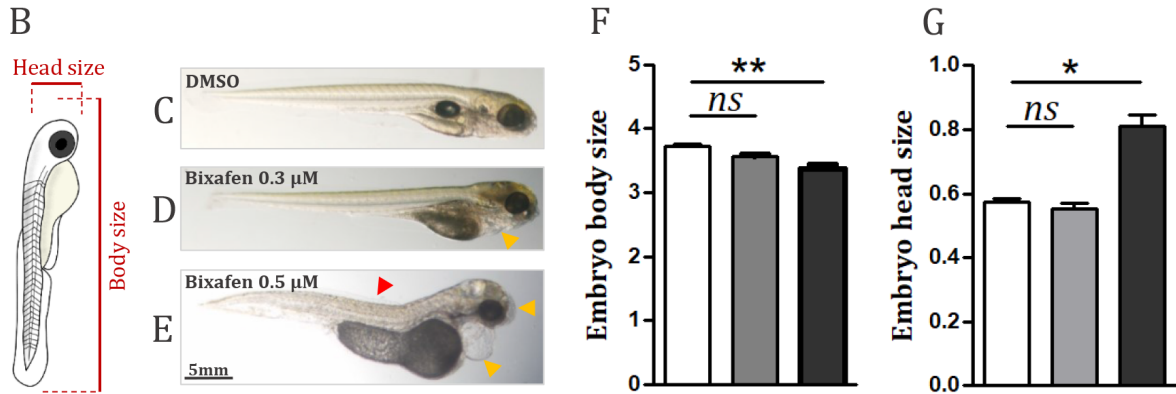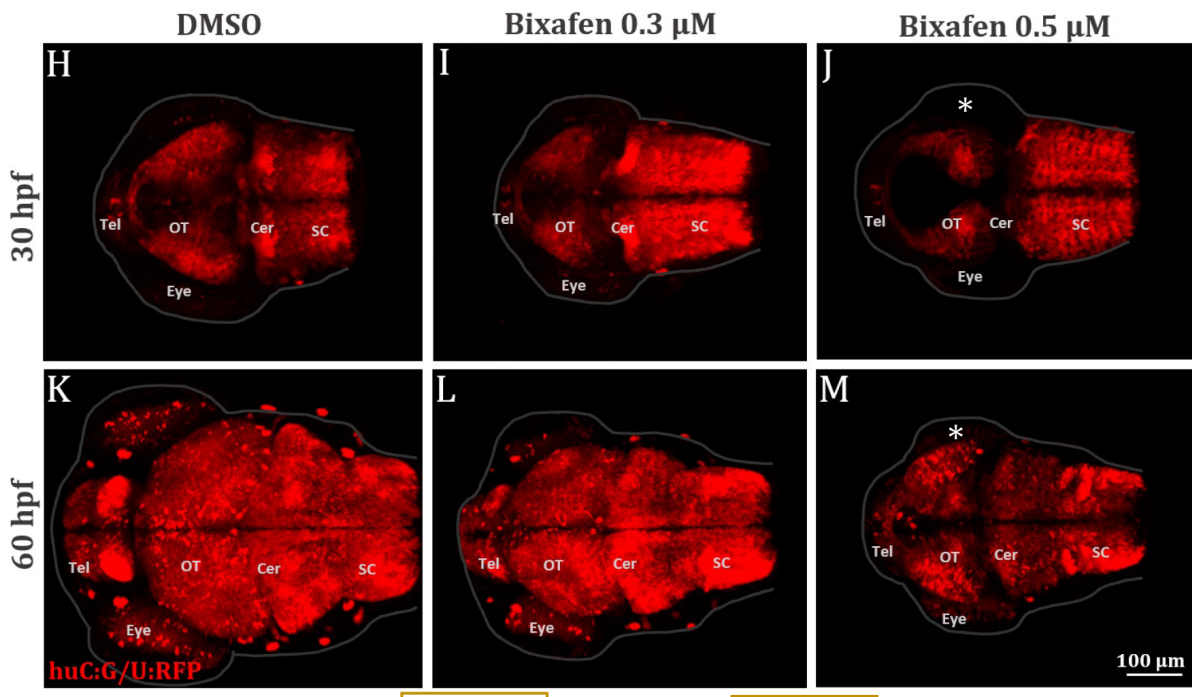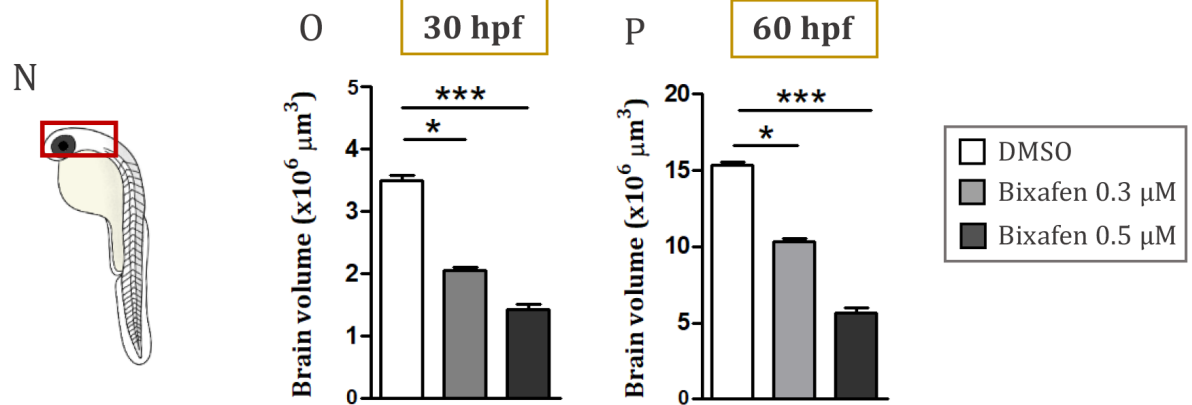



345 **Figure 1: Acute exposure to bixafen causes microcephaly.**

346 (A) Illustration of the experimental setup used to analyze body morphology and brain size  
347 on acute exposure to bixafen. (B) Illustration of the measurements used to assess body  
348 size and brain size of embryos. (C-E) Images of 4 dpf embryos treated with DMSO (C), 0.3  
349  $\mu\text{M}$  (D) or 0.5  $\mu\text{M}$  bixafen (E). (D) Image showing a small pericardial edema at the LOAEL  
350 (0.3  $\mu\text{M}$ , D, yellow arrowhead) or severe pericardial and periocular edema at the LC50  
351 (0.5  $\mu\text{M}$ , E, yellow arrowheads) and a curved tail (E, red arrowhead). (F, G) Measurements  
352 of body (F) and head (G) size of 4 dpf embryos treated with DMSO (N=4), 0.3  $\mu\text{M}$  (N=4) or  
353 0.5  $\mu\text{M}$  (N=4) bixafen. (H-M) Dorsal view images of Tg(huC:G/U:RFP) embryos at 30 hpf  
354 (H-J) or 60 hpf (K-M), treated with DMSO (H, K), 0.3  $\mu\text{M}$  bixafen (I, L) or 0.5  $\mu\text{M}$  bixafen  
355 (J, M), showing a microcephaly in both stages on exposure to bixafen, with an increase in  
356 severity at 0.5  $\mu\text{M}$ . (N) Illustration of a zebrafish embryo; the red line marks the depth at  
357 which confocal imaging was performed on (H-M). (O, P) Quantifications of the brain size  
358 of embryos at 30 hpf (O) or 60 hpf (P), treated with DMSO (N(30hpf)=5; N(60hpf)=5), 0.3  
359  $\mu\text{M}$  bixafen (N(30hpf)=13; N(60hpf)=12) or 0.5  $\mu\text{M}$  bixafen (N(30hpf)=6; N(60hpf)=5),  
360 showing significantly smaller brains in embryos exposed to bixafen at LOAEL  
361 concentration and worsened with increase in concentration LC50, confirming the  
362 observations in (H-M). \*\*\* $p < 0.001$ ; \*\* $p < 0.01$ ; \* $p < 0.05$ . Scale bar : (C-E) = 5 mm ; (H-  
363 M) = 100  $\mu\text{m}$ .

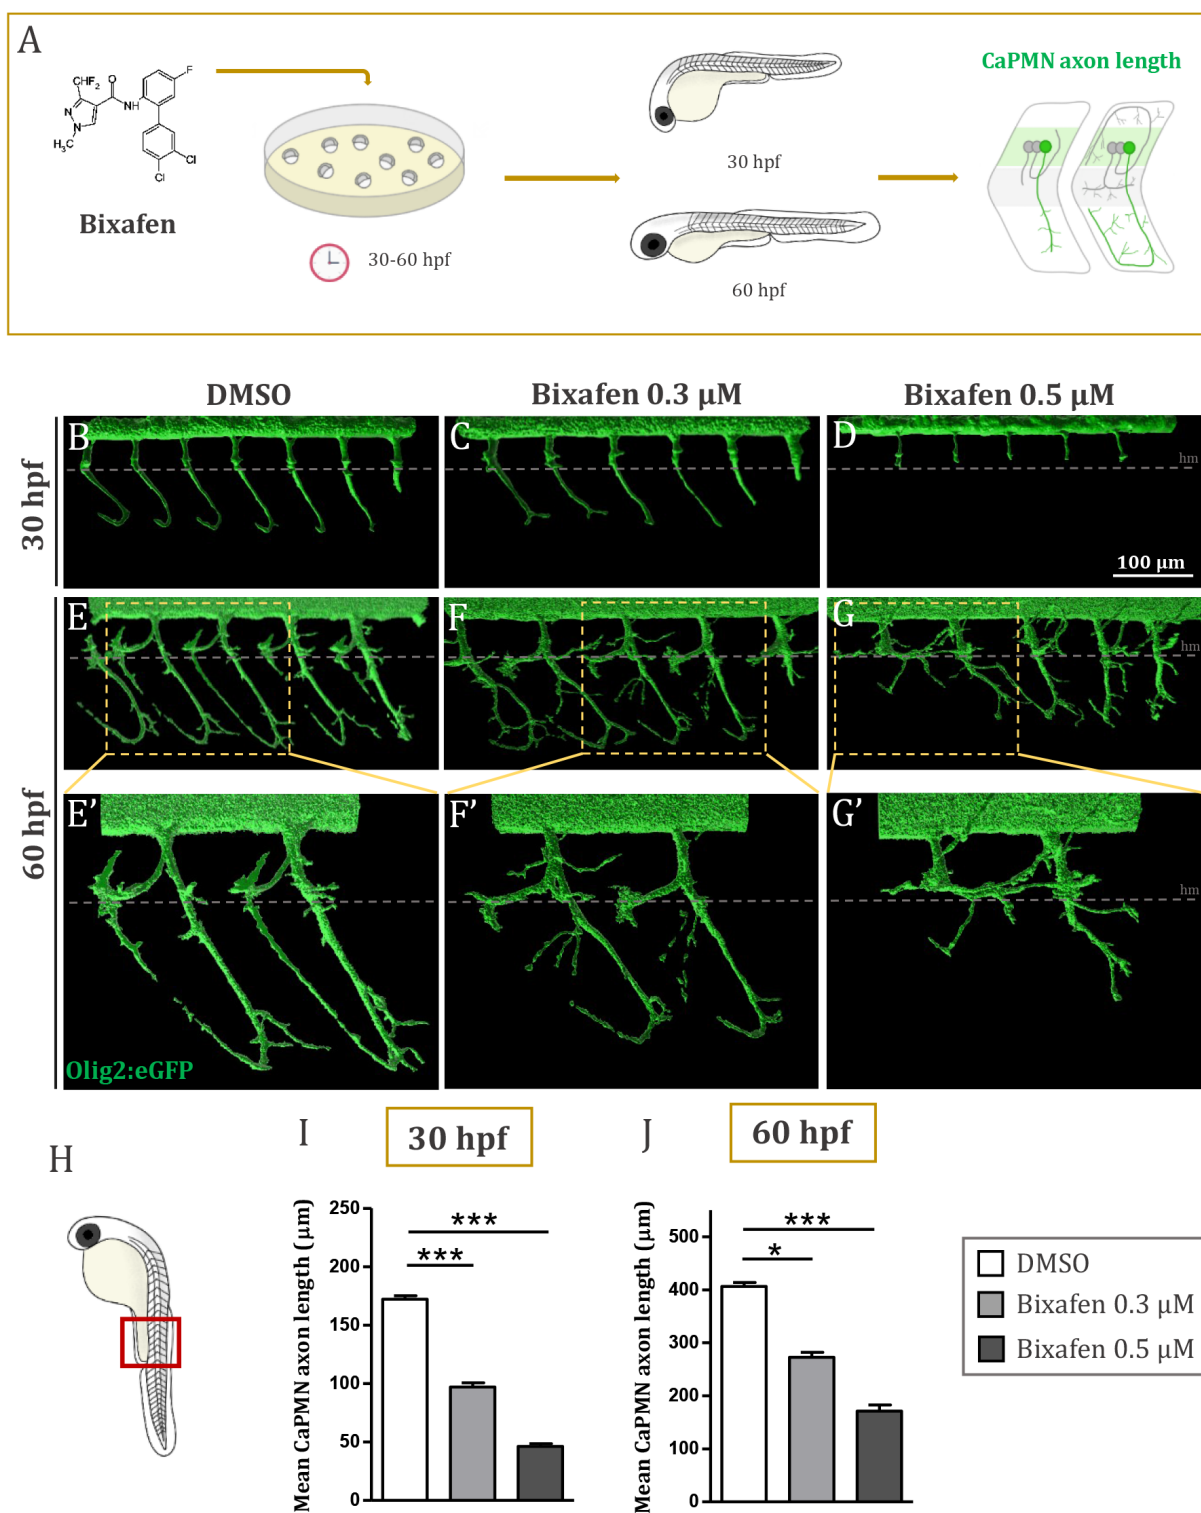

364

365 **Figure 2: Acute exposure to bixafen alters motor neuron axon development.**

366 (A) Illustration of the experimental setup used to analyze caudal primary motor neuron

367 (CaPMN) axons length on acute exposure to bixafen. (B-G) Three-dimensional

368 reconstructions of the lateral view of a section of Tg(Olig2:eGFP) embryo tails at 30 hpf  
369 (**B-D**) or 60 hpf (**E-G**) treated with DMSO (vehicle, **B, E**), 0.3  $\mu$ M bixafen (**C, F**) or 0.5  $\mu$ M  
370 bixafen (**D, G**), showing developmental defects of the CaPMN axon on exposure to bixafen  
371 at 0.3  $\mu$ M concentration that is worsened with the concentration increase (0.5  $\mu$ M). (**E'**-  
372 **G'**) Close-ups extracted from respectively **E, F** and **G**, showing that bixafen causes  
373 developmental defects of CaPMN axons, that is worsened by increasing concentrations.  
374 (**H**) Illustration of a zebrafish embryo; the red line marks the depth at which confocal  
375 imaging was performed on (**B-G**). (**I, J**) Quantifications of the CaPMN axon length of  
376 embryos at 30 hpf (**I**) or 60 hpf (**J**), treated with DMSO (N(30hpf)=8; N(60hpf)=8), 0.3  $\mu$ M  
377 bixafen (N(30hpf)=17; N(60hpf)=17) or 0.5  $\mu$ M bixafen (N(30hpf)=16; N(60hpf)=13),  
378 showing significantly shorter axons in embryos exposed to bixafen at LOAEL (0.3  $\mu$ M) and  
379 worsened with increase in concentration (LC50 0.5  $\mu$ M), confirming the observations in  
380 (**B-G**). \*\*\* $p < 0.001$ ; \*\* $p < 0.01$ ; \* $p < 0.05$ . Scale bar : (**B-G**) = 100  $\mu$ m.

381

## 382 **References**

383 Abad-Fuentes, A., Ceballos-Alcantarilla, E., Mercader, J. V., Agulló, C., Abad-Somovilla, A.,  
384 and Esteve-Turrillas, F. A. (2015). Determination of succinate-dehydrogenase-  
385 inhibitor fungicide residues in fruits and vegetables by liquid chromatography-  
386 tandem mass spectrometry. *Anal. Bioanal. Chem.* 407. doi:10.1007/s00216-015-  
387 8608-3.

388 Akerboom, J., Chen, T.-W., Wardill, T. J., Tian, L., Marvin, J. S., Mutlu, S., et al. (2012).  
389 Optimization of a GCaMP Calcium Indicator for Neural Activity Imaging. *J. Neurosci.*  
390 32, 13819–13840. doi:10.1523/JNEUROSCI.2601-12.2012.

391 Añasco, N. C., Koyama, J., and Uno, S. (2010). Pesticide residues in coastal waters affected  
392 by rice paddy effluents temporarily stored in a wastewater reservoir in southern

393 Japan. *Arch. Environ. Contam. Toxicol.* 58, 352–360. doi:10.1007/s00244-009-9364-  
394 1.

395 Ardisson, A., Invernizzi, F., Nasca, A., Moroni, I., Farina, L., and Ghezzi, D. (2015).  
396 Mitochondrial leukoencephalopathy and complex II deficiency associated with a  
397 recessive SDHB mutation with reduced penetrance. *Mol. Genet. Metab. Reports* 5,  
398 51–54. doi:10.1016/j.ymgmr.2015.10.006.

399 Asakawa, K., Suster, M. L., Mizusawa, K., Nagayoshi, S., Kotani, T., Urasaki, A., et al.  
400 (2008). Genetic dissection of neural circuits by Tol2 transposon-mediated Gal4  
401 gene and enhancer trapping in zebrafish. *Proc. Natl. Acad. Sci. U. S. A.* 105, 1255–  
402 1260. doi:10.1073/pnas.0704963105.

403 B, V., and C, P. (1990). The Neurotoxicity of Parathion-Induced Acetylcholinesterase  
404 Inhibition in Neonatal Rats. *Neurotoxicology* 11.

405 Bénit, P., Kahn, A., Chretien, D., Bortoli, S., Huc, L., Schiff, M., et al. (2019). Evolutionarily  
406 conserved susceptibility of the mitochondrial respiratory chain to SDHI pesticides  
407 and its consequence on the impact of SDHIs on human cultured cells. *PLoS One* 14.  
408 doi:10.1371/journal.pone.0224132.

409 Bénit, P., Letouzé, E., Rak, M., Aubry, L., Burnichon, N., Favier, J., et al. (2014).  
410 Unsuspected task for an old team: Succinate, fumarate and other Krebs cycle acids  
411 in metabolic remodeling. *Biochim. Biophys. Acta - Bioenerg.* 1837, 1330–1337.  
412 doi:10.1016/j.bbabi.2014.03.013.

413 Bertolote, J. M., Fleischmann, A., Eddleston, M., and Gunnell, D. (2006). Deaths from  
414 pesticide poisoning: A global response. *Br. J. Psychiatry* 189, 201–203.  
415 doi:10.1192/bjp.bp.105.020834.

416 Birch-Machin, M. A., Taylor, R. W., Cochran, B., Ackrell, B. A. C., and Turnbull, D. M.  
417 (2000). Late-onset optic atrophy, ataxia, and myopathy associated with a mutation

- 418 of a complex II gene. *Ann. Neurol.* 48, 330–335. doi:10.1002/1531-  
419 8249(200009)48:3<330::AID-ANA7>3.0.CO;2-A.
- 420 Bourgeron, T. (2015). From the genetic architecture to synaptic plasticity in autism  
421 spectrum disorder. *Nat. Rev. Neurosci.* 16, 551–563. doi:10.1038/nrn3992.
- 422 Brenet, A., Somkhit, J., Hassan-Abdi, R., Yanicostas, C., Igert, A., Saurat, D., et al. (2019).  
423 Preclinical zebrafish model for organophosphorus intoxication: neuronal  
424 hyperexcitation, behavioral abnormalities and subsequent brain damages. *bioRxiv*,  
425 2019.12.15.876649. doi:10.1101/2019.12.15.876649.
- 426 Brusteine, E., Saint-Amant, L., Buss, R. R., Chong, M., McDearmid, J. R., and Drapeau, P.  
427 (2003). Steps during the development of the zebrafish locomotor network. in  
428 *Journal of Physiology Paris*, 77–86. doi:10.1016/j.jphysparis.2003.10.009.
- 429 Finsterer, J. (2008). Cognitive decline as a manifestation of mitochondrial disorders  
430 (mitochondrial dementia). *J. Neurol. Sci.* 272, 20–33. doi:10.1016/j.jns.2008.05.011.
- 431 Ghezzi, D., Goffrini, P., Uziel, G., Horvath, R., Klopstock, T., Lochmüller, H., et al. (2009).  
432 SDHAF1, encoding a LYR complex-II specific assembly factor, is mutated in SDH-  
433 defective infantile leukoencephalopathy. *Nat. Genet.* 41, 654–656.  
434 doi:10.1038/ng.378.
- 435 Graillet, V., Tomasetig, F., Cravedi, J. P., and Audebert, M. (2012). Evidence of the in vitro  
436 genotoxicity of methyl-pyrazole pesticides in human cells. *Mutat. Res. - Genet.*  
437 *Toxicol. Environ. Mutagen.* 748, 8–16. doi:10.1016/j.mrgentox.2012.05.014.
- 438 Horváth, R., Abicht, A., Holinski-Feder, E., Laner, A., Gempel, K., Prokisch, H., et al. (2006).  
439 Leigh syndrome caused by mutations in the flavoprotein (Fp) subunit of succinate  
440 dehydrogenase (SDHA). *J. Neurol. Neurosurg. Psychiatry* 77, 74–76.  
441 doi:10.1136/jnnp.2005.067041.
- 442 Howard, A. S., Bucelli, R., Jett, D. A., Bruun, D., Yang, D., and Lein, P. J. (2005). Chlorpyrifos

443 exerts opposing effects on axonal and dendritic growth in primary neuronal  
444 cultures. *Toxicol. Appl. Pharmacol.* 207, 112–124. doi:10.1016/j.taap.2004.12.008.

445 Lein, P., Silbergeld, E., Locke, P., and Goldberg, A. M. (2005). In vitro and other  
446 alternative approaches to developmental neurotoxicity testing (DNT). in  
447 *Environmental Toxicology and Pharmacology* (Elsevier), 735–744.  
448 doi:10.1016/j.etap.2004.12.035.

449 Martin, C., Dubouchaud, H., Mosoni, L., Chardigny, J. M., Oudot, A., Fontaine, E., et al.  
450 (2007). Abnormalities of mitochondrial functioning can partly explain the  
451 metabolic disorders encountered in sarcopenic gastrocnemius. *Aging Cell* 6, 165–  
452 177. doi:10.1111/j.1474-9726.2007.00271.x.

453 Merhi, M., Raynal, H., Cahuzac, E., Vinson, F., Cravedi, J. P., and Gamet-Payrastre, L.  
454 (2007). Occupational exposure to pesticides and risk of hematopoietic cancers:  
455 Meta-analysis of case-control studies. *Cancer Causes Control* 18, 1209–1226.  
456 doi:10.1007/s10552-007-9061-1.

457 Muñoz-Quezada, M. T., Lucero, B. A., Barr, D. B., Steenland, K., Levy, K., Ryan, P. B., et al.  
458 (2013). Neurodevelopmental effects in children associated with exposure to  
459 organophosphate pesticides: A systematic review. *Neurotoxicology* 39, 158–168.  
460 doi:10.1016/j.neuro.2013.09.003.

461 Myers, P. Z. (1985). Spinal motoneurons of the larval zebrafish. *J. Comp. Neurol.* 236,  
462 555–561. doi:10.1002/cne.902360411.

463 Myers, P. Z., Eisen, J. S., and Westerfield, M. (1986). Development and axonal outgrowth  
464 of identified motoneurons in the zebrafish. *J. Neurosci.* 6, 2278–2289.  
465 doi:10.1523/jneurosci.06-08-02278.1986.

466 Paganelli, A., Gnazzo, V., Acosta, H., López, S. L., and Carrasco, A. E. (2010). Glyphosate-  
467 based herbicides produce teratogenic effects on vertebrates by impairing retinoic

- 468 acid signaling. *Chem. Res. Toxicol.* 23, 1586–1595. doi:10.1021/tx1001749.
- 469 Parfait, B., Chretien, D., Rötig, A., Marsac, C., Munnich, A., and Rustin, P. (2000).
- 470 Compound heterozygous mutations in the flavoprotein gene of the respiratory
- 471 chain complex II in a patient with Leigh syndrome. *Hum. Genet.* 106, 236–243.
- 472 doi:10.1007/s004390051033.
- 473 Perry, C. G., Young, W. F., McWhinney, S. R., Bei, T., Stergiopoulos, S., Knudson, R. A., et al.
- 474 (2006). Functioning paraganglioma and gastrointestinal stromal tumor of the
- 475 jejunum in three women: Syndrome or coincidence. *Am. J. Surg. Pathol.* 30, 42–49.
- 476 doi:10.1097/01.pas.0000178087.69394.9f.
- 477 Qian, L., Cui, F., Yang, Y., Liu, Y., Qi, S., and Wang, C. (2018). Mechanisms of
- 478 developmental toxicity in zebrafish embryos (*Danio rerio*) induced by boscalid. *Sci.*
- 479 *Total Environ.* 634, 478–487. doi:10.1016/j.scitotenv.2018.04.012.
- 480 Rauh, V. A., Perera, F. P., Horton, M. K., Whyatt, R. M., Bansal, R., Hao, X., et al. (2012).
- 481 Brain anomalies in children exposed prenatally to a common organophosphate
- 482 pesticide. *Proc. Natl. Acad. Sci. U. S. A.* 109, 7871–7876.
- 483 doi:10.1073/pnas.1203396109.
- 484 Ravichandra, N. G. (2018). *Agrochemicals in Plant Disease Management*.
- 485 Rehfus, A., Miessner, S., Achenbach, J., Strobel, D., Bryson, R., and Stammer, G. (2016).
- 486 Emergence of succinate dehydrogenase inhibitor resistance of *Pyrenophora teres* in
- 487 Europe. *Pest Manag. Sci.* 72, 1977–1988. doi:10.1002/ps.4244.
- 488 Ricketts, C., Zeegers, M. P., Lubinski, J., and Maher, E. R. (2009). Analysis of germline
- 489 variants in CDH1, IGFBP3, MMP1, MMP3, STK15 and VEGF in familial and sporadic
- 490 renal cell carcinoma. *PLoS One* 4. doi:10.1371/journal.pone.0006037.
- 491 Ross, S. M. K., McManus, I. C., Harrison, V., and Mason, O. (2013). Neurobehavioral
- 492 problems following low-level exposure to organophosphate pesticides: A

- 493 systematic and meta-analytic review. *Crit. Rev. Toxicol.* 43, 21–44.  
494 doi:10.3109/10408444.2012.738645.
- 495 Shin, J., Park, H. C., Topczewska, J. M., Madwsley, D. J., and Appel, B. (2003). Neural cell  
496 fate analysis in zebrafish using olig2 BAC transgenics. *Methods Cell Sci.* 25, 7–14.  
497 doi:10.1023/B:MICS.0000006847.09037.3a.
- 498 Stratakis, C. A., and Carney, J. A. (2009). The triad of paragangliomas, gastric stromal  
499 tumours and pulmonary chondromas (Carney triad), and the dyad of  
500 paragangliomas and gastric stromal sarcomas (Carney-Stratakis syndrome):  
501 Molecular genetics and clinical implications. in *Journal of Internal Medicine* (J Intern  
502 Med), 43–52. doi:10.1111/j.1365-2796.2009.02110.x.
- 503 Svartz, G., Meijide, F., and Pérez Coll, C. (2016). Effects of a fungicide formulation on  
504 embryo-larval development, metamorphosis, and gonadogenesis of the South  
505 American toad *Rhinella arenarum*. *Environ. Toxicol. Pharmacol.* 45, 1–7.  
506 doi:10.1016/j.etap.2016.05.008.
- 507 Tanabe, A., and Kawata, K. (2009). Daily variation of pesticides in surface water of a  
508 small river flowing through paddy field Area. *Bull. Environ. Contam. Toxicol.* 82,  
509 705–710. doi:10.1007/s00128-009-9695-7.
- 510 Timmers, H. J. L. M., Gimenez-Roqueplo, A. P., Mannelli, M., and Pacak, K. (2009). Clinical  
511 aspects of SDHx-related pheochromocytoma and paraganglioma. *Endocr. Relat.*  
512 *Cancer* 16, 391–400. doi:10.1677/ERC-08-0284.
- 513 Tsuda, T., Nakamura, T., Inoue, A., and Tanaka, K. (2009). Pesticides in water, fish and  
514 shellfish from littoral area of lake biwa. *Bull. Environ. Contam. Toxicol.* 82, 716–721.  
515 doi:10.1007/s00128-009-9681-0.
- 516 Van Coster, R., Seneca, S., Smet, J., Van Hecke, R., Gerlo, E., Devreese, B., et al. (2003).  
517 Homozygous Gly555Glu mutation in the nuclear-encoded 70 kDa flavoprotein gene



518 causes instability of the respiratory chain complex II. *Am. J. Med. Genet.* 120A, 13–  
519 18. doi:10.1002/ajmg.a.10202.

520 van den Berg, F., Tiktak, A., Heuvelink, G. B. M., Burgers, S. L. G. E., Brus, D. J., de Vries, F.,  
521 et al. (2012). Propagation of Uncertainties in Soil and Pesticide Properties to  
522 Pesticide Leaching. *J. Environ. Qual.* 41, 253–261. doi:10.2134/jeq2011.0167.

523 Veloukas, T., Markoglou, A. N., and Karaoglanidis, G. S. (2013). Differential effect of SdhB  
524 gene mutations on the sensitivity to SDHI fungicides in botrytis cinerea. *Plant Dis.*  
525 97, 118–122. doi:10.1094/PDIS-03-12-0322-RE.

526 VKM Report (2014). Health risk assessment of the fungicide Aviator Xpro EC 225 -  
527 Vitenskapskomiteen for mat og miljø. 1–19. Available at:  
528 <https://vkm.no/english/riskassessments/allpublications/healthriskassessmentoft>  
529 [hefungicideaviatorxproec225.4.62c3f31d15e03ed297212ed.html](https://vkm.no/english/riskassessments/allpublications/healthriskassessmentoft/hefungicideaviatorxproec225.4.62c3f31d15e03ed297212ed.html)

530 VKM Report (2015). Risk assessment of the metabolite M44 of bixafen, one of the active  
531 substances in Aviator Xpro EC 225 - Vitenskapskomiteen for mat og miljø. 1–20.  
532 Available at:  
533 <https://vkm.no/english/riskassessments/allpublications/riskassessmentofthemet>  
534 [abolitem44ofBixafenoneoftheactivesubstancesinaviatorxproec225.4.62c3f31d15e0](https://vkm.no/english/riskassessments/allpublications/riskassessmentofthemetabolitem44ofBixafenoneoftheactivesubstancesinaviatorxproec225.4.62c3f31d15e03ed2972a8d.html)  
535 [3ed2972a8d.html](https://vkm.no/english/riskassessments/allpublications/riskassessmentofthemetabolitem44ofBixafenoneoftheactivesubstancesinaviatorxproec225.4.62c3f31d15e03ed2972a8d.html)

536 Vu, H. T., Keough, M. J., Long, S. M., and Pettigrove, V. J. (2016). Effects of the boscalid  
537 fungicide Filan® on the marine amphipod *Allorchestes compressa* at  
538 environmentally relevant concentrations. *Environ. Toxicol. Chem.* 35, 1130–1137.  
539 doi:10.1002/etc.3247.

540 Wang, H., Meng, Z., Liu, F., Zhou, L., Su, M., Meng, Y., et al. (2020). Characterization of  
541 boscalid-induced oxidative stress and neurodevelopmental toxicity in zebrafish  
542 embryos. *Chemosphere* 238. doi:10.1016/j.chemosphere.2019.124753.

- 543 Weichenthal, S., Moase, C., and Chan, P. (2010). A review of pesticide exposure and  
544 cancer incidence in the agricultural health study cohort. *Environ. Health Perspect.*  
545 118, 1117–1125. doi:10.1289/ehp.0901731.
- 546 Westerfield, M., McMurray, J. V., and Eisen, J. S. (1986). Identified motoneurons and their  
547 innervation of axial muscles in the zebrafish. *J. Neurosci.* 6, 2267–2277.  
548 doi:10.1523/jneurosci.06-08-02267.1986.
- 549 Wu, S., Lei, L., Liu, M., Song, Y., Lu, S., Li, D., et al. (2018). Single and mixture toxicity of  
550 strobilurin and SDHI fungicides to *Xenopus tropicalis* embryos.  
551 doi:10.1016/j.ecoenv.2018.01.045.
- 552 Yamashita, M., and Fraaije, B. (2018). Non-target site SDHI resistance is present as  
553 standing genetic variation in field populations of *Zymoseptoria tritici*. *Pest Manag.*  
554 *Sci.* 74, 672–681. doi:10.1002/ps.4761.
- 555 Yang, Y., Dong, F., Liu, X., Xu, J., Wu, X., Qi, S., et al. (2018). Thifluzamide affects lipid  
556 metabolism in zebrafish (*Danio reio*). *Sci. Total Environ.* 633, 1227–1236.  
557 doi:10.1016/j.scitotenv.2018.03.302.
- 558 Yao, H., Yu, J., Zhou, Y., Xiang, Q., and Xu, C. (2018). The embryonic developmental effect  
559 of sedaxane on zebrafish (*Danio rerio*). doi:10.1016/j.chemosphere.2018.01.046.
- 560 Yoshida, M., Inoue, K., and Takahashi, M. (2015). Predictive modes of action of pesticides  
561 in uterine adenocarcinoma development in rats. *J. Toxicol. Pathol.* 28, 207–216.  
562 doi:10.1293/tox.2015-0026.
- 563
